# Supplementary material
Source: PubMed Central journal article supplement (PMC11384627)
Supplement: PBI-19-2192-s003.pdf [file PBI-19-2192-s003.pdf]

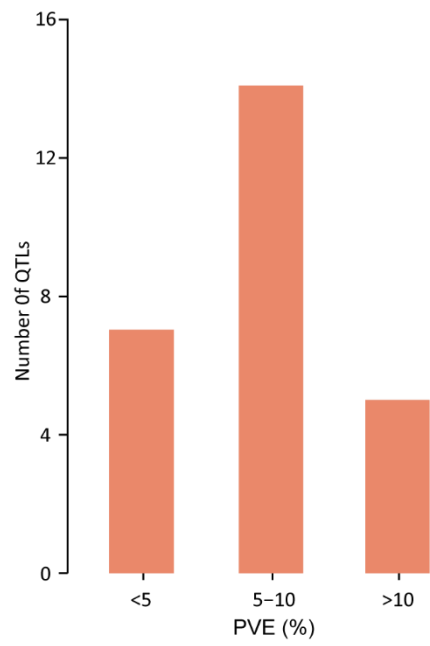

**Figure S1. Number of QTLs for starch content identified via the SLM method sorted according to PVE value.**

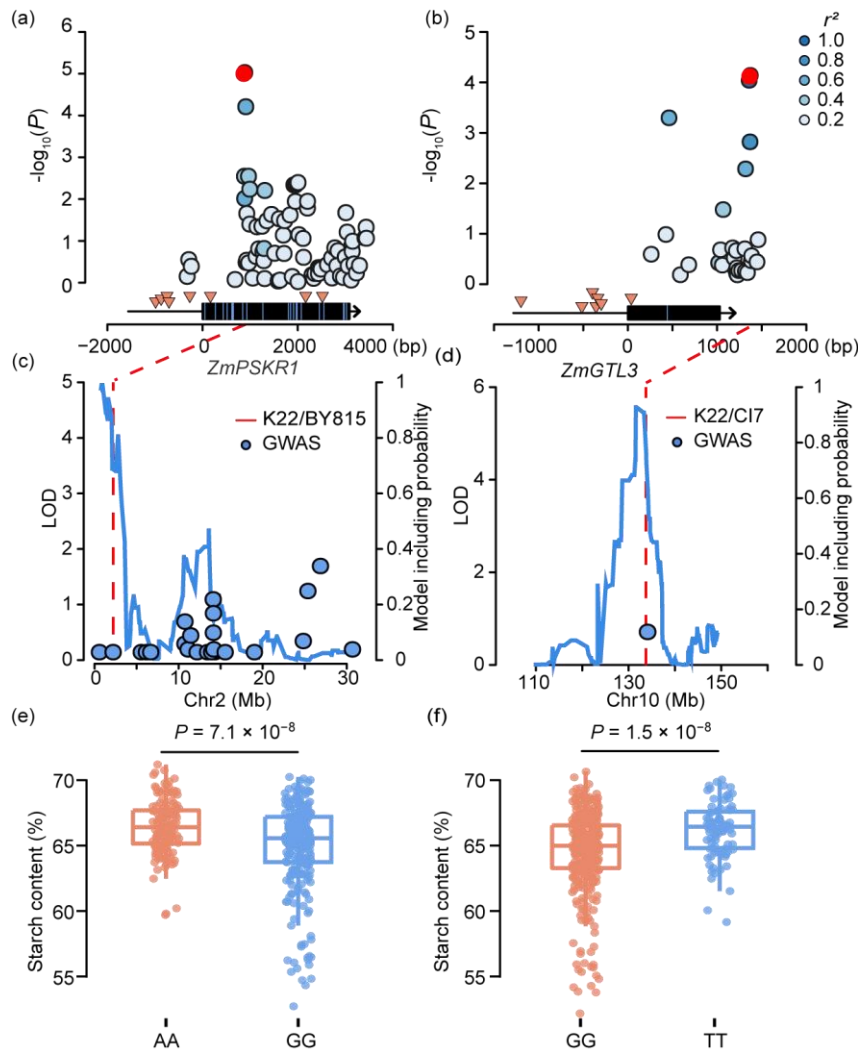

**Figure S2 Associations between starch content and *ZmPSKR1* and *ZmGTL3*.** (a,b)

Associations between the SNPs at the *ZmPSKR1* (a) and *ZmGTL3* (b) loci and starch content. The red dots show the lead SNP with the most significant association. Color coding of the remaining SNPs reflects the extent of their linkage disequilibrium ( $r^2$ ) with the lead SNP. The black and gray boxes above the  $x$  axis represent exons and UTRs, respectively. The InDels (orange triangles) and nonsynonymous SNPs (blue vertical lines) in the promoter and exons are shown. (c, d) Co-localization between candidate genes and the QTL or SNPs identified via SLM and RIL-based GWAS for *ZmPSKR1* (c) and *ZmGTL3* (d). The blue line shows the LOD profile of the QTL identified via SLM for the indicated RILs, whereas the blue dots represent the results

of the RIL-GWAS. The red dashed lines indicate the position of candidate genes. (e, f)  
The genetic effects of the lead SNPs at the *ZmPSKR1* (e) and *ZmGTL3* (f) loci on starch content. The *P*-values were calculated based on a two-tailed Student's *t*-test.

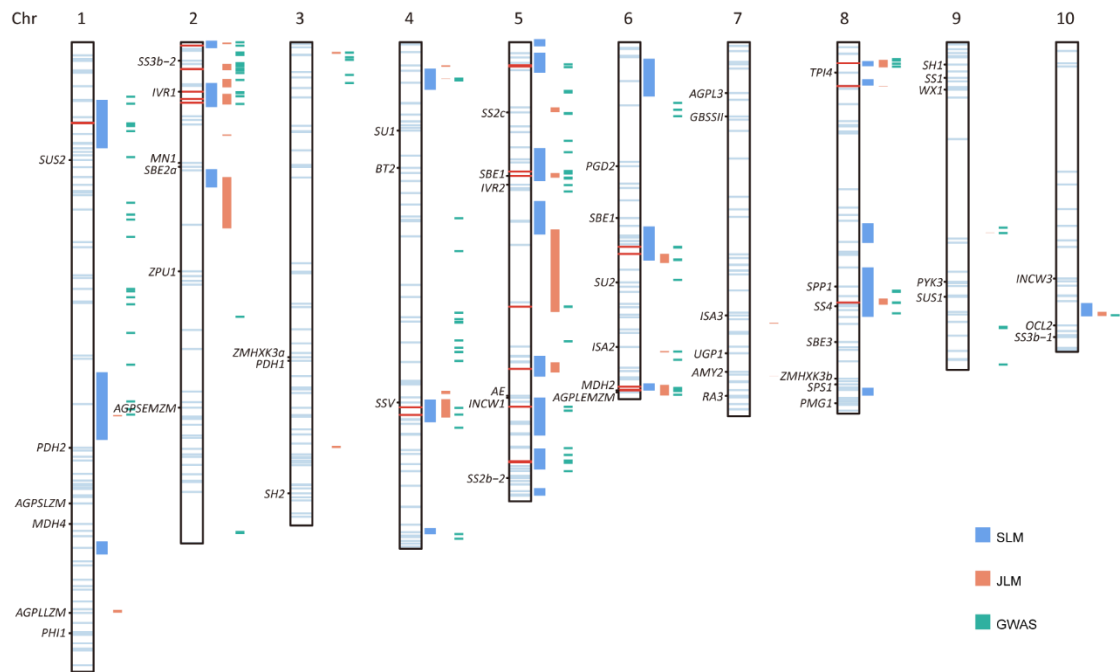

**Figure S3. Co-localization of the identified QTLs and 471 genes involved in carbohydrate metabolism.** The QTLs identified by SLM, JLM, and GWAS are represented as vertical rectangles of different colors next to each chromosome. The horizontal light blue lines on each chromosome show the positions of the 471 identified genes. The red horizontal lines denote those identified genes that co-localized with the QTLs identified by at least two methods.

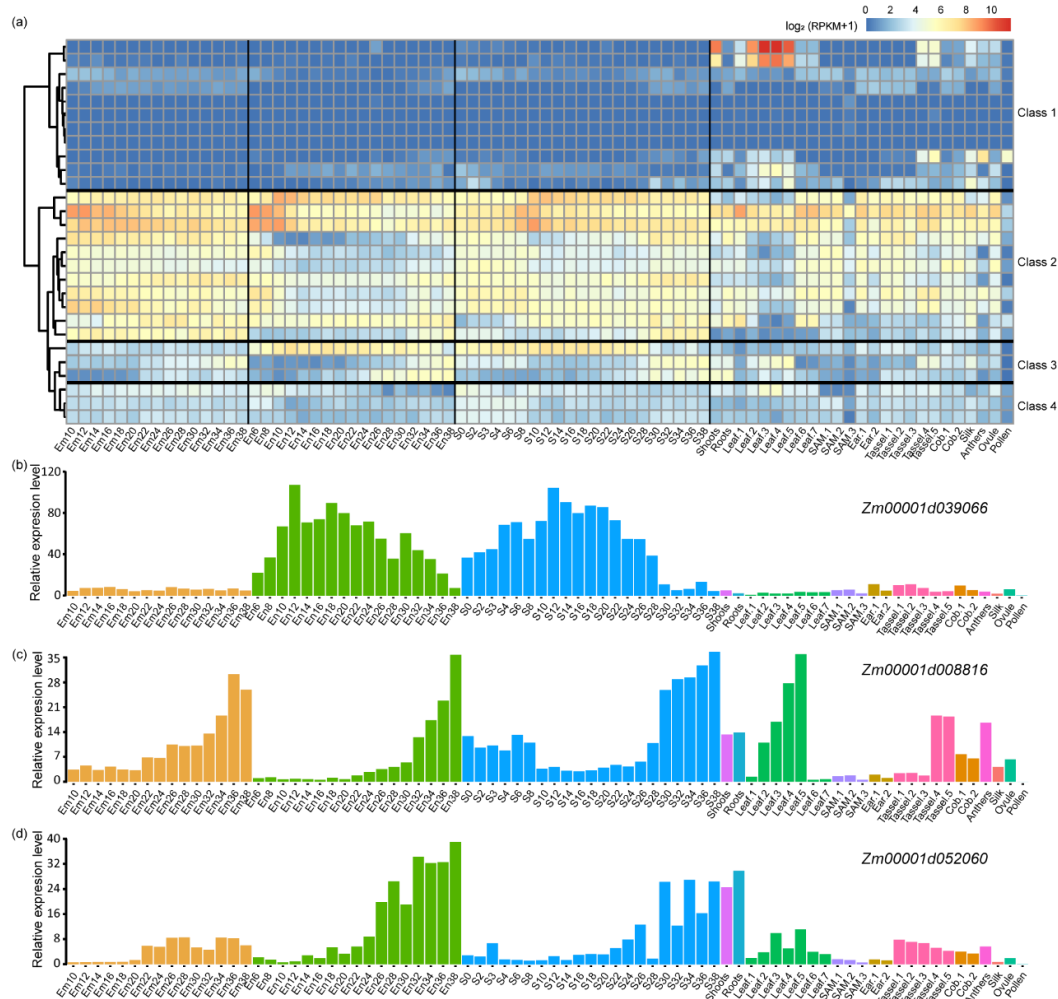

**Figure S4. Expression patterns of 28 pathway genes co-localized with the detected QTLs.** (a) Hierarchical clustering of 28 genes based on their expressional levels in different tissues from the public transcriptome data (**Dataset S3**; Chen *et al.*, 2014). The  $\log_2$ -based values of one plus the normalized gene transcription level as reads per kilobase per million (RPKM) were used to build the heatmap. The rows in the heat map indicate the genes, and the columns indicate the tissues. Red represents high abundance, and blue represents low abundance. (b–d) Expression pattern of *Zm00001d039066* (b), *Zm00001d008816* (c), and *Zm00001d052060* (d) in various tissues at different stages of development. Em: embryo; En: endosperm; S: seed; SAM: shoot apical meristem.

|                      |     |  |        |       |       |        |       |        |        |       |      |      |      |      |     |      |      |      |     |    |    |   |   |
|----------------------|-----|--|--------|-------|-------|--------|-------|--------|--------|-------|------|------|------|------|-----|------|------|------|-----|----|----|---|---|
|                      |     |  | 10     | 20    | 30    | 40     | 50    | 60     |        |       |      |      |      |      |     |      |      |      |     |    |    |   |   |
| ATTPS11_AT2G18700    | 1   |  | MSPESW | KDQLS | LVSAD | DDYRIM | GRN-- | RIPNAV | TKLS   | GLE   | TD   | DD   | PP   | NGG  | AWV | T    | KPKR | I    | VVS | NQ |    |   |   |
| LOC_Os02g54820       | 1   |  | MPSLS  | CHNLL | DLVAA | ADDA   | ASPAS | LPRVMS | AA     | SPAS  | PTSP | STPA | ---  | P    | ARR | VVS  | HR   |      |     |    |    |   |   |
| SORBI_3004G325900    | 1   |  | MPSLS  | CHNLL | DLAA  | DEVPL  | PSPT  | LR     | LPRVMS | VAS   | SPAS | PTSP | SPA  | ---  | P   | RR   | VIVS | HR   |     |    |    |   |   |
| TraesCS6D02G334000.2 | 1   |  | MPSLS  | CHNLL | DL--  | ADEL   | PLPP  | SPL    | R      | LPRVM | AGAS | SPSS | ASPS | SPSG | --- | P    | RR   | VIVS | HR  |    |    |   |   |
| TPS9_Zm00001d052060  | 1   |  | MPSLS  | CHNLL | DLAA  | DEVPL  | PSPT  | LR     | LPRVMS | VAS   | SPAS | PTSP | SPPA | ---  | P   | RR   | VIVS | HR   |     |    |    |   |   |
|                      |     |  | 70     | 80    | 90    | 100    | 110   | 120    |        |       |      |      |      |      |     |      |      |      |     |    |    |   |   |
| ATTPS11_AT2G18700    | 59  |  | LPLRA  | HRD   | ISSN- | KWCF   | FFD   | NDSL   | LYL    | QLKDG | FP   | PETE | V    | VYVG | SL  | NADV | LP   | SE   | QED | V  | SQ | F |   |
| LOC_Os02g54820       | 58  |  | LPLRA  | AA    | DA    | AS     | PF    | GF     | FT     | VD    | S    | DA   | VAY  | QL   | RS  | GL   | PP   | GAP  | V   | L  | H  | I | G |
| SORBI_3004G325900    | 58  |  | LPLRA  | S     | P     | DA     | AP    | F      | G      | F     | N    | S    | V    | D    | S   | G    | T    | V    | A   | Y  | Q  | L | R |
| TraesCS6D02G334000.2 | 56  |  | LPLRA  | S     | P     | DA     | AP    | F      | G      | F     | K    | F    | T    | V    | D   | A    | G    | T    | V   | A  | Y  | Q | L |
| TPS9_Zm00001d052060  | 58  |  | LPLRA  | S     | P     | DA     | AP    | F      | G      | F     | R    | F    | S    | V    | D   | A    | G    | T    | V   | A  | Y  | Q | L |
|                      |     |  | 130    | 140   | 150   | 160    | 170   | 180    |        |       |      |      |      |      |     |      |      |      |     |    |    |   |   |
| ATTPS11_AT2G18700    | 118 |  | LEKF   | Q     | C     | V      | P     | T      | F      | L     | P    | S    | D    | L    | N   | K    | Y    | H    | G   | F  | C  | K | H |
| LOC_Os02g54820       | 118 |  | L      | A     | N     | F      | S     | C      | L      | P     | V    | Y    | L    | P    | A   | D    | L    | H    | R   | R  | F  | Y | H |
| SORBI_3004G325900    | 118 |  | L      | A     | N     | F      | S     | C      | L      | P     | V    | Y    | L    | P    | T   | D    | L    | H    | R   | R  | F  | Y | H |
| TraesCS6D02G334000.2 | 116 |  | V      | S     | A     | F      | S     | C      | L      | P     | V    | Y    | L    | P    | A   | D    | L    | H    | R   | R  | F  | Y | H |
| TPS9_Zm00001d052060  | 118 |  | L      | A     | N     | F      | S     | C      | L      | P     | V    | Y    | L    | P    | T   | D    | L    | H    | R   | R  | F  | Y | H |
|                      |     |  | 190    | 200   | 210   | 220    | 230   | 240    |        |       |      |      |      |      |     |      |      |      |     |    |    |   |   |
| ATTPS11_AT2G18700    | 176 |  | K      | I     | F     | A      | D     | R      | L      | T     | E    | V    | L    | S    | P   | D    | D    | D    | V   | W  | I  | H | D |
| LOC_Os02g54820       | 178 |  | R      | A     | F     | A      | D     | R      | L      | T     | E    | V    | L    | S    | P   | D    | D    | D    | V   | W  | I  | H | D |
| SORBI_3004G325900    | 178 |  | R      | A     | F     | A      | D     | R      | L      | T     | E    | V    | L    | S    | P   | D    | D    | D    | V   | W  | I  | H | D |
| TraesCS6D02G334000.2 | 176 |  | R      | A     | F     | A      | D     | R      | L      | T     | E    | V    | L    | S    | P   | D    | D    | D    | V   | W  | I  | H | D |
| TPS9_Zm00001d052060  | 178 |  | R      | A     | F     | A      | D     | R      | L      | T     | E    | V    | L    | S    | P   | D    | D    | D    | V   | W  | I  | H | D |
|                      |     |  | 250    | 260   | 270   | 280    | 290   | 300    |        |       |      |      |      |      |     |      |      |      |     |    |    |   |   |
| ATTPS11_AT2G18700    | 236 |  | R      | D     | D     | L      | R     | A      | L      | L     | N    | A    | D    | L    | V   | G    | F    | H    | T   | F  | D  | Y |   |
| LOC_Os02g54820       | 238 |  | R      | D     | D     | L      | R     | A      | L      | L     | N    | A    | D    | L    | V   | G    | F    | H    | T   | F  | D  | Y |   |
| SORBI_3004G325900    | 238 |  | R      | D     | D     | L      | R     | A      | L      | L     | N    | A    | D    | L    | V   | G    | F    | H    | T   | F  | D  | Y |   |
| TraesCS6D02G334000.2 | 236 |  | R      | D     | D     | L      | R     | A      | L      | L     | N    | A    | D    | L    | V   | G    | F    | H    | T   | F  | D  | Y |   |
| TPS9_Zm00001d052060  | 238 |  | R      | D     | D     | L      | R     | A      | L      | L     | N    | A    | D    | L    | V   | G    | F    | H    | T   | F  | D  | Y |   |
|                      |     |  | 310    | 320   | 330   | 340    | 350   | 360    |        |       |      |      |      |      |     |      |      |      |     |    |    |   |   |
| ATTPS11_AT2G18700    | 296 |  | G      | I     | D     | M      | G     | Q      | L      | R     | S    | V    | V    | S    | A   | P    | E    | T    | A   | D  | V  | V |   |
| LOC_Os02g54820       | 298 |  | G      | I     | D     | M      | G     | Q      | L      | R     | S    | V    | V    | S    | A   | P    | E    | T    | A   | D  | V  | V |   |
| SORBI_3004G325900    | 298 |  | G      | I     | D     | M      | G     | Q      | L      | R     | S    | V    | V    | S    | A   | P    | E    | T    | A   | D  | V  | V |   |
| TraesCS6D02G334000.2 | 296 |  | G      | I     | D     | M      | G     | Q      | L      | R     | S    | V    | V    | S    | A   | P    | E    | T    | A   | D  | V  | V |   |
| TPS9_Zm00001d052060  | 298 |  | G      | I     | D     | M      | G     | Q      | L      | R     | S    | V    | V    | S    | A   | P    | E    | T    | A   | D  | V  | V |   |
|                      |     |  | 370    | 380   | 390   | 400    | 410   | 420    |        |       |      |      |      |      |     |      |      |      |     |    |    |   |   |
| ATTPS11_AT2G18700    | 356 |  | E      | L     | R     | G      | A     | V      | L      | V     | Q    | I    | A    | N    | P   | A    | R    | S    | E   | G  | R  | D |   |
| LOC_Os02g54820       | 358 |  | E      | L     | R     | G      | A     | V      | L      | V     | Q    | I    | A    | N    | P   | A    | R    | S    | E   | G  | R  | D |   |
| SORBI_3004G325900    | 358 |  | E      | L     | R     | G      | A     | V      | L      | V     | Q    | I    | A    | N    | P   | A    | R    | S    | E   | G  | R  | D |   |
| TraesCS6D02G334000.2 | 356 |  | E      | L     | R     | G      | A     | V      | L      | V     | Q    | I    | A    | N    | P   | A    | R    | S    | E   | G  | R  | D |   |
| TPS9_Zm00001d052060  | 358 |  | E      | L     | R     | G      | A     | V      | L      | V     | Q    | I    | A    | N    | P   | A    | R    | S    | E   | G  | R  | D |   |
|                      |     |  | 430    | 440   | 450   | 460    | 470   | 480    |        |       |      |      |      |      |     |      |      |      |     |    |    |   |   |
| ATTPS11_AT2G18700    | 416 |  | K      | V     | A     | Y      | A     | A      | I      | S     | E    | C    | V    | V    | N   | A    | V    | R    | D   | G  | M  | N |   |
| LOC_Os02g54820       | 417 |  | K      | A     | A     | Y      | A     | A      | A      | E     | C    | C    | V    | S    | A   | V    | R    | D    | G   | L  | N  | R |   |
| SORBI_3004G325900    | 417 |  | K      | A     | A     | Y      | A     | A      | A      | E     | C    | C    | V    | S    | A   | V    | R    | D    | G   | L  | N  | R |   |
| TraesCS6D02G334000.2 | 415 |  | K      | A     | A     | Y      | A     | A      | A      | E     | C    | C    | V    | S    | A   | V    | R    | D    | G   | L  | N  | R |   |
| TPS9_Zm00001d052060  | 417 |  | K      | A     | A     | Y      | A     | A      | A      | E     | C    | C    | V    | S    | A   | V    | R    | D    | G   | L  | N  | R |   |
|                      |     |  | 490    | 500   | 510   | 520    | 530   | 540    |        |       |      |      |      |      |     |      |      |      |     |    |    |   |   |
| ATTPS11_AT2G18700    | 476 |  | C      | S     | P     | S      | L     | S      | G      | A     | I    | R    | V    | N    | P   | W    | N    | I    | D   | A  | V  | T |   |
| LOC_Os02g54820       | 470 |  | C      | S     | P     | S      | L     | S      | G      | A     | I    | R    | V    | N    | P   | W    | S    | V    | E   | S  | M  | A |   |
| SORBI_3004G325900    | 471 |  | C      | S     | P     | S      | L     | S      | G      | A     | I    | R    | V    | N    | P   | W    | S    | V    | E   | S  | V  | A |   |
| TraesCS6D02G334000.2 | 468 |  | C      | S     | P     | S      | L     | S      | G      | A     | I    | R    | V    | N    | P   | W    | S    | V    | E   | S  | V  | A |   |
| TPS9_Zm00001d052060  | 471 |  | C      | S     | P     | S      | L     | S      | G      | A     | I    | R    | V    | N    | P   | W    | S    | V    | E   | S  | V  | A |   |
|                      |     |  | 550    | 560   | 570   | 580    | 590   | 600    |        |       |      |      |      |      |     |      |      |      |     |    |    |   |   |
| ATTPS11_AT2G18700    | 536 |  | L      | Q     | R     | A      | C     | K      | D      | H     | Y    | N    | K    | R    | F   | W    | G    | V    | G   | F  | L  | F |   |
| LOC_Os02g54820       | 530 |  | L      | Q     | R     | A      | C     | K      | D      | H     | F    | S    | R    | R    | H   | W    | G    | I    | G   | F  | G  | M |   |
| SORBI_3004G325900    | 531 |  | L      | Q     | R     | A      | C     | K      | D      | H     | F    | S    | R    | R    | H   | W    | G    | I    | G   | F  | G  | M |   |
| TraesCS6D02G334000.2 | 528 |  | L      | Q     | R     | A      | C     | K      | D      | H     | F    | S    | R    | R    | H   | W    | G    | I    | G   | F  | G  | M |   |
| TPS9_Zm00001d052060  | 531 |  | L      | Q     | R     | A      | C     | K      | D      | H     | F    | S    | R    | R    | H   | W    | G    | I    | G   | F  | G  | M |   |

Glycosyl transferase

Mutation site

Phosphatase box A

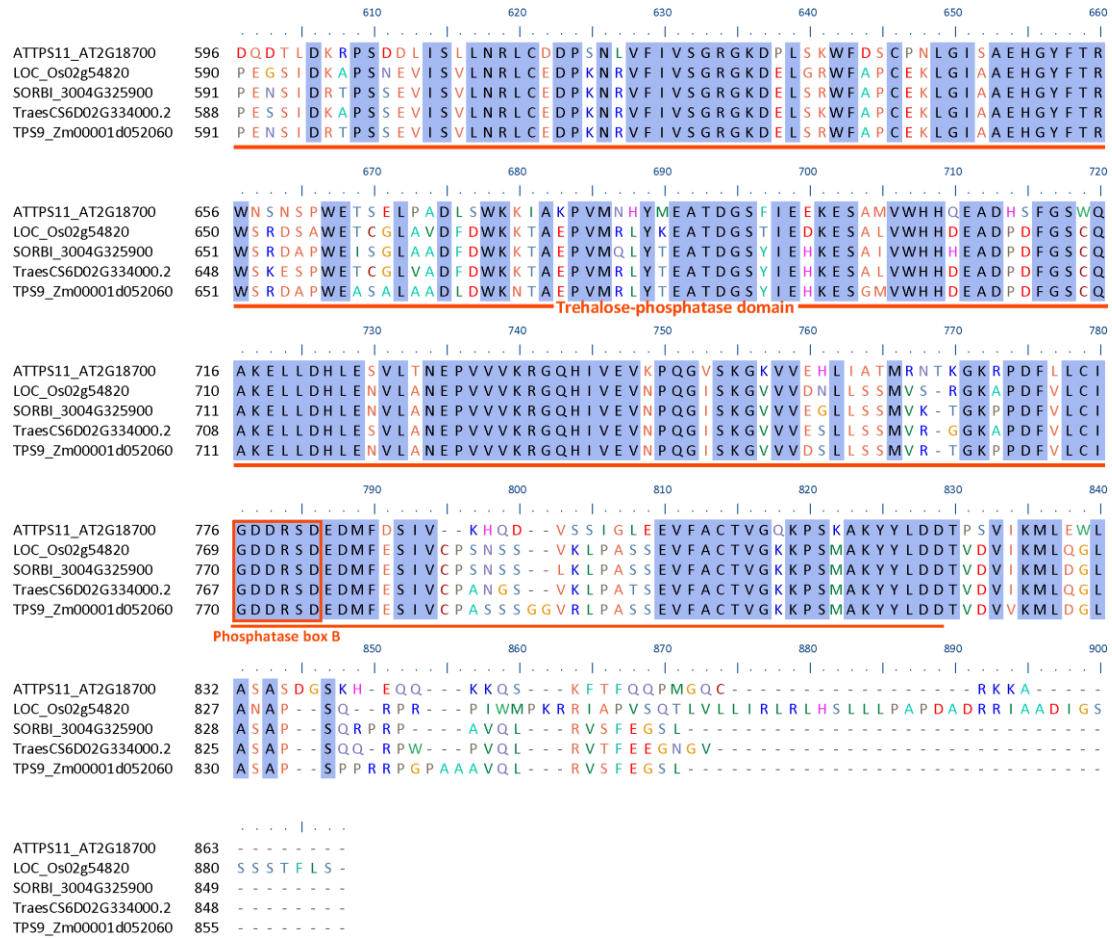

**Figure S5.** The amino acid sequence alignment of TPS proteins from *Arabidopsis thaliana*, *Oryza sativa*, *Sorghum bicolor*, *Triticum aestivum*, and *Zea mays*. Identical residues are highlighted in blue. The orange lines indicate the glycosyltransferase domain and trehalose-6-phosphate phosphatase-like domain. The trehalose-6-phosphate phosphatase-like domain contains conserved phosphatase consensus sequence boxes A and B, depicted in orange boxes. The scale above indicates the sequence position of amino acids after alignment. The orange star indicates the mutation position of *tps9*.

▼Promoter

K22 1 CCGTAGCGTAAGCCACCGATGACTGAAAGTAGGGGACGTTCTGCATCACTGCATGAACGAGTATAAACCTTACGCCTC--TGCAAACCT  
 CI7 1 CCGTAGCGTAAGCCACCGATGACTGAAAGTAGGGGACGTT-----CTGCATGAACGAGTATAAACCTTATGCCCTCCGGCAAACCT

K22 89 CCGGAGCCCAACACGTATACTAAATTTACTTGTGAGCGATGTATGAAACACCAACAATAAGAATAAAAAATTTACTTATCCCCTGT  
 CI7 83 CCGGAGCCCAACACGTATAATAAATTTACTTGTGAGCGATGTATGAAACACCAACAATAAGAATAAAAAATTTACCATCCCCTGT

K22 179 CAATTTATAATGTGCTTGACTTTTTTACTAAATTTGATTGGTTCGTCTTAATAAAGAGTCTATAAAAAAT---AAAAATCCAATGGCG  
 CI7 173 CAATTTATAATTTGCTTGACTTTTTTACTAAGTTAATTGGTTCGTCTTAATAAAGAGTCTATAAAAAATAAAAAAAATCCAATGTCA

K22 266 TACTTAAA-----GTAAATAGTATTGCAATAAAAAATTAATAATAATTATAAAA-TTTTTTAATAAGATGTACCGATCAACATA  
 CI7 263 TACTTAAAGCATATTATGCTAAATACTATCAAAATAAAAAATTAATAATAATTATAAAA-TTTTTTAATAAGATGAACCGATCAACATA

K22 344 TGATAAAAAATATCAAAGGGAACATAGATTGGTCCCGATATCGAGGGTAACAAGTGGTATTGTGGGTATTTTTATTAACTTGAACCTGG  
 CI7 353 TGATAAAAAATATCAAAGGGAACATAGATTGGTCCCGATATCGAGGGTAACAAGTGGTATTGTGGGTATTTTTATTAACTTGAACCTGG

K22 434 TAAAGTATACTTTGGAATGATC---TATTAAATTTGTTGAATATAGAGTATAGATTTAGCGGATTAGTTAAATCTCAATCTGATTCCGTG  
 CI7 443 TAAAGTATACTTTGGAATGATCAGTATTAAATTTGTTGAATATAGAGTATAGATTTAGCGGATTAGTTAAATCTCAATCTGATTCCGTG

K22 521 TACCAAGATCTGGTCAAACGGGCCATGAACCACCGTTAGCCGACCGGACACTGATGCACCAACCATCCCACATCCCACGTGGGG  
 CI7 533 TACCAAGATCTGGTCAAACGGGCCGTGAACCACCGTTAGCCGACCGGACACTGATGCACCAACCATCCCACATCCCACGTGGGG

K22 611 AAGAGCGGGCAATGCCGTCAATTCGCGGGCGAACGTTGTGGAAGAGGCGATGTACAGTGGTGTCTTAAGTTGTCTTAGAGTGTGT  
 CI7 623 AAGAGCGGGCAGTGGCCGTCAATTCGCGGGCGAACGATGTGGA-----

K22 701 CTAGGGGGGTGAATGTAAAAATCTCAAGCATGTATCTTGACGAAGACACAGTGTCTTAGCTCTATATTCGAGACAGGAGACTATCTGA  
 CI7 666

InDel283  
 K22 791 TTGGTCACTTTAATTTATTGAATGTTCTGATTGGTACAAATGAATATGGTAAGACACATGTTTAGACATGACCACTGTATTATGTTGTG  
 CI7 666

K22 881 TTTAGCTGTGTCTTACTTGGAGTACCGTGCAGCTGTATCTAGGTTGTACATGCCCTAAGACTAGAGGCCAAGCCATGCGCCATGC  
 CI7 666 TAAAGTGTAGAGGCCAAGCCATGCGCCATGC

▼5'UTR

K22 971 CGTCACACCTCCTACTCTGACCTCCGGTTCGCCCCGTCCGTTCTTCTTCTCCTCGCCGCTCAGACACGCACACGCATATCCAGCTTGCCAT  
 CI7 700 CGTCACACCTCCTACTCTGACCTCCGGTTCGCCCCGTCCGTTCTTCTTCTCCTCGCCGCTCAGACACGCACACGCATATCCAGCTTGCCAT

K22 1061 ATTTGTACCACCTGTCTCCTCCGTGCCGAGACCCACCTCGGCGTTCTTATCCCAGAAACTTCGGCAAAAGTGATCGATCCGTCTCC  
 CI7 790 ATTTGTACCACCTGTCTCCTCCGTGCCGAGACCCACCTCGGCGTTCTTATCCCAGAAACTTCGGCAAAAGTGATCGATCCGTCTCC

K22 1151 CACTCCCACCCCGACCGACCGACCGCCGAAACGAAACCGGTACACCTCGTCCGCTCGCGGCGCTTCTCTTCTTCTCATGCGCTATCGCCGC  
 CI7 880 CACTCCCACCCCGACCGACCGCCGAAACGAAACCGGTACACCTCGTCCGCTCGCGGCGCTTCTCTTCTTCTCATGCGCTATCGCCGC

▼Exon1

K22 1241 CGCCTCCACCTCTGCGACGCCACAGATAGGCAAGAGGAGGACGAGGAGGCGATGCGCTTCCGCTCTCCTGCCAACCTCCTCGACCTCGC  
 CI7 970 CGCCTCCACCTCTGCGACGCCACAGATAGGCAAGAGGAGGACGAGGAGGCGATGCGCTTCCGCTCTCCTGCCAACCTCCTCGACCTCGC

K22 1331 CGCTGCCGACGAGGTGCCCTGCCGTGCCGACGCCGCTCCGCTCCCGCGCTCATGTCCGTCCGCTCCCGGCTCGCCACCTCGCC  
 CI7 1060 CGCTGCCGACGAGGTGCCCTGCCGTGCCGACGCCGCTCCGCTCCCGCGCTCATGTCCGTCCGCTCCCGGCTCGCCACCTCGCC

K22 1421 GTCCCGCCCGCCCGCCGCGCGCTCATCGTCTCCACCGTCTGCCGCTCCGCGCTCGCCGACCCCTCCGCGCCCTTCGGATTCA  
 CI7 1150 GTCCCGCCCGCCCGCCGCGCGCTCATCGTCTCCACCGTCTGCCGCTCCGCGCTCGCCGACCCCTCCGCGCCCTTCGGATTCA

K22 1511 GTTCTCCGTGACGCGCGCCGCTCGGCTACCGTCCGCTCGGGCTGCCACCAACGCGCCGCTCCTCCACATCGGCACCTCCAGC  
 CI7 1240 GTTCTCCGTGACGCGCGCCGCTCGGCTACCGTCCGCTCGGGCTGCCACCAACGCGCCGCTCCTCCACATCGGCACCTCCAGC

K22 1601 GGCCGCGCGGAGGCGCCCTCAGATGAGTTGTCCAACCTACCTGCTGGCAATTTCTCGTGCCTGCCGGTGTACCTTCCACCGACCTCCA  
 CI7 1330 GGCCGCGCGGAGGCGCCCTCAGATGAGTTGTCCAACCTACCTGCTGGCAATTTCTCGTGCCTGCCGGTGTACCTTCCACCGACCTCCA

K22 1691 CCACCGCTTACACCGGATTCTGCAAGCACTACCTCTGGCCGCTCCTCCACTACCTCCTCCGCTGACGCCCTCCTCGCTCGGTGGCT  
 CI7 1420 CCACCGCTTACACCGGATTCTGCAAGCACTACCTCTGGCCGCTCCTCCACTACCTCCTCCGCTGACGCCCTCCTCGCTCGGTGGCT

K22 1781 CCCTTTCAGCGAACGCTTACCACCTCCTCTCGGCCAACAGGGCGTTGCGGACCGCCTCACCAGGTTGCTTCCCCGACGAGGA  
 CI7 1510 CCCTTTCAGCGAACGCTTACCACCTCCTCTCGGCCAACAGGGCGTTGCGGACCGCCTCACCAGGTTGCTTCCCCGACGAGGA

K22 1871 CCTCGTCTGGATCCACGATTACCACCTCCTCGCGCTCCGACCTTCTCCGCAAGCGCTTCCCGCGCCAAAGGTCGGATTCTTCTCCA  
 CI7 1600 CCTCGTCTGGATCCACGATTACCACCTCCTCGCGCTCCGACCTTCTCCGCAAGCGCTTCCCGCGCCAAAGGTCGGATTCTTCTCCA

K22 1961 CTCACCTTTCCCCTCGTGGAGATCTTCCGTACGATCCCCTGCGGGATGACCTCGTCCGCGACTCCTCAACGCCGACCTCGTGGCTT  
 CI7 1690 CTCACCTTTCCCCTCGTGGAGATCTTCCGTACGATCCCCTGCGGGATGACCTCGTCCGCGACTCCTCAACGCCGACCTCGTGGCTT

K22 2051 CCACACCTTCGACTACGCGGCCACTTCTGTCCGCGTGTGCGGGTGTGCTCGGCCTCGACTACCAAGCGCGGTACATCGGCAT  
 CI7 1780 CCACACCTTCGACTACGCGGCCACTTCTGTCCGCGTGTGCGGGTGTGCTCGGCCTGACTACCAAGCGCGGTACATCGGCAT

K22 2141 CGAGTATTACGGCCGACCGTACTGTCAAGATACTCCCGTGGGATCGACATGGGGCAGCTCAGATCGGTGGTCTCGGCGCGGAGAC  
 CI7 1870 CGAGTATTACGGCCGACCGTACTGTCAAGATACTCCCGTGGGATCGACATGGGGCAGCTCAGATCGGTGGTCTCGGCGCGGAGAC

K22 2231 GGAGGACGCGGTGCGGCGGGTACAGAGGCGTACAAGGGGAGGCGCCTCATGGTAGGCGTGCAGACGCTCGATCTGTTCAAGGGGATCGG  
 CI7 1960 GGAGGACGCGGTGCGGCGGGTACAGAGGCGTACAAGGGGAGGCGCCTCATGGTAGGCGTGCAGACGCTCGATCTGTTCAAGGGGATCGG

K22 2321 GCTCAAGTTCTGGCGATGGAGCACTGCTCGTGGAGCACCGGAGCTCCGCGCGCGCCGCTGCTGGTGCAGATCGCCAAACCTGCCCG  
 CI7 2050 GCTCAAGTTCTGGCGATGGAGCACTGCTCGTGGAGCACCGGAGCTCCGCGCGCGCCGCTGCTGGTGCAGATCGCCAAACCTGCCCG

K22 2411 CAGCGAAGGGCGGACGTCGAAGCGTGCAGGACGAGGCCAGGGCCATCAGCGCCGGGTCAATGCGCGCTTCCGACCCCCGGGTACAC  
 CI7 2140 CAGCGAAGGGCGGACGTCGAAGCGTGCAGGACGAGGCCAGGGCCATCAGCGCTGGGTCAATGCGCGCTTCCGACCCCCGGGTACAC

GAC (Asp)

K22 2501 GCCGATCGTGTCTCATCGACGACCCGGTACGCGCAGGAGAAAGCCGCTACTACGCGCGCCGAGTGTGCTGCTGAGCGCCGTGCG  
 CI7 2230 GCCGATCGTGTCTCATCGACGACCCGGTACGCGCAGGAGAAAGCCGCTACTACGCGCGCCGAGTGTGCTGCTGAGCGCCGTGCG

GGC (Gly)

K22 2591 CGACGGGCTCAACCGGATCCCGTACATCTATACGGTGTGCCGCGAGGAGACCCGCTCGGAGACGACGCGCCAAAGCGGAGCCCAT  
 CI7 2320 CGACGGGCTCAACCGGATCCCGTACATCTATACGGTGTGCCGCGAGGAGACCCGCTCGGAGACGACGCGCCAAAGCGGAGCCCAT

K22 2681 CGTGCTCTCAAGGTTCTGCGTTGCTCCCGTCCCTCAGCGGCGGATCCGCGTGAACCCGTGGAGCGTGGAGTCCGTGGCGGAGCCAT  
 CI7 2410 CGTGCTCTCAAGGTTCTGCGTTGTTCCCGTCCCTCAGCGGCGGATCCGCGTGAACCCGTGGAGCGTGGAGTCCGTGGCGGAGCCAT

K22 2771 GAAACCGCGCTGCGGATGCCGAGGCCGAGCAGCGGCTGCGGCACGAGAAGCACTACAAGTACGTGAGCACCCACGACGTGCCTACTG  
 CI7 2500 GAAACCGCGCTGCGGATGCCGAGGCCGAGCAGCGGCTGCGGCACGAGAAGCACTACAAGTACGTGAGCACCCACGACGTGCCTACTG



K22 2861 GGC GCGGT CCTT CGACT CGGACCT GCAGCGCGCTGCAAGGACCATTCTCGCGCCGGCATTGGGGGATCGGGTTCGGCATGAGCTTCAA  
 CI7 2590 GGC GCGGT CCTT CGACT CGGACCT GCAGCGCGCTGCAAGGACCATTCTCGCGCCGGCATTGGGGGATCGGGTTCGGCATGAGCTTCAA  
 K22 2951 GGTGGTGGCCCTTGGCCCGAACTTCCGGCGGCTCTCCGTGGAGCACATTGTCCCTTCTGATCGGAGGACGGAGAACC GGCTGATTCTCCT  
 CI7 2680 GGTGGTGGCCCTTGGCCCGAACTTCCGGCGGCTCTCCGTGGAGCACATTGTCCCTTCTGATCGGAGGACGGAGAACC GGCTGATTCTCCT  
 K22 3041 GGACTACGACGGCACCGTGATGCCGGAGAATTCGATCGACCGGACGCCGAGCAGTGAGGTCATCTCTGTGCTGAATCGTCTGTGCGAGGA  
 CI7 2770 GGACTACGACGGCACCGTGATGCCGGAGAATTCGATCGACCGGACGCCGAGCAGTGAGGTCATCTCTGTGCTGAATCGTCTGTGCGAGGA  
 K22 3131 CCCC AAGAACAGAGTGTTCATCGTGAGCGGGCGTGGGAAGGACGAGCTGAGTAGGTGGTTCGCCCCCTGCGAGAAGCTGGGCATCGCGGC  
 CI7 2860 CCCC AAGAACAGAGTGTTCATCGTGAGCGGGCGGGGAAGGACGAGCTGAGTAGGTGGTTCGCCCCCTGCGAGAAGCTGGGCATCGCGGC  
 K22 3221 GGAGCA CGTTACTT CACAAGG TAAAAATCTTCGTACACTGTTCCACCGGCGAAGTTCGCTGGTAGTTCGTTTTGGTACCACCTTTGCT  
 CI7 2950 GGAGCA TGGTACTT CACAAGG TAAAAATCTTCGTACAA TGTTCACCGGCGAAGTTCGCTGGTAGTTCGTTTTGGTACCACCTTTGCT  
 K22 3311 TTGCTTGGATTGGGTTCTTATTA CTGCTCCAGATTCCGGCCACAGAA TAGAATGGTACGAATTAAGCAATGGTACC CGCAAATCTAG  
 CI7 3040 TTGCTTGGATTGGGTTCTTATTA CTGCTCCAGATTCCGGCCACAGAA TAGAATGGTACGAATTAAGCAATGGTACC CGCAAATCTAG  
 K22 3401 GAGGAGCGTT CATATTCTGATGCGTTGGT CAGTCACTTTTGGTTACA ACTAGTCCCACCGTCCGTCCACACAGAAAGAAGACTGCAATT  
 CI7 3130 GAGGAGCGTT CATATTCTGATGCGTTGGT CAGTCACTTTTGGTTACA ACTAGTCCCACCGTCCGTCCACACAGAAAGAAGACTGCAATT  
 K22 3491 GTCGTTTTCGTTTTTAAAGGAGTCCGAAGAGTCTGAACCTTCAACTTTGACCAATTTATTCGTATAAAAAGGTACCAACGTT CATAATATA  
 CI7 3220 GTCGTTTTCGTTTTTAAAGGAGTCCGAAGAGTCTGAACCTTCAACTTTGACCAATTTATTCGTATAAAAAGGTACCAACGTT CATAATATA  
 K22 3581 AAATAACTATAATTTATAGTTATAGAATATGTTTTAAAATAAGTTTATTTGAAGTAAACATTTATTGATTATAAAAAATTA CTCAA  
 CI7 3308 AAATAACTATAATTTATAGTTATAGAATATGTTTTAAAATAAGTTTATTTGAAGTAAACATTTATTGATTATAAAAAATTA CTCAA  
 K22 3671 CTTGTGCATTTCTTCGCGCGA CGGAGTTAAGTCCAGAGAGCGTTCTGTTCTA ACTTGTAAATGTAGTAGGGCGATACGTGACAACGGGT  
 CI7 3398 CTTGTGCATTTCTTCGCGCGA TGGAGTTGAGTCCAGAGAGCA TCTGTTCTA ACTTGTAAATGTAGTAGG CCGATACGTGACAACGGGT  
 K22 3761 CACCGACTCTTTTGTCTGCAGGTGGAGCAGGGACGCGCATGGGAGGCCTCAGCATTGGCCGCGACCTGGACTGGAAGAACACCGCGGA  
 CI7 3488 CACCGACTCTTTTGTCTGCAGGTGGAGCAGGGACGCGCATGGGAGGCCTCAGCATTGGCCGCGACCTGGACTGGAAGAACACCGCGGA  
 K22 3851 GCCGGTGTGCGGCTGTACACGGAGGCAACGGACGGCTCTACATCGAGCACAAAGGAGAGCGGCATGGTCTGGCACCACGACGAGGCGGA  
 CI7 3578 GCCGGTGTGCGGCTGTACACGGAGGCAACGGACGGCTCTACATCGAGCACAAAGGAGAGCGGCATGGTCTGGCACCACGACGAGGCGGA  
 K22 3941 TCCGGACTTCGGTTCCTGCCAGGCCAAGGAGCTGCTCGACCATCTCGAGAACGTGCTGGCCAAACGAACCCGTTGGTGGTGAAGAGAGGCCA  
 CI7 3668 TCCGGACTTCGGTTCCTGCCAGGCCAAGGAGCTGCTCGACCATCTCGAGAACGTGCTGGCCAAACGAACCCGTTGGTGGTGAAGAGAGGCCA  
 K22 4031 GCACATCGTGGAGGTGAACCCCAAGTGAAGT CATGAGCGGGCGAG ---- CCAGACGCGTGCATGC -TTTTTCTCTGCTCATTAAATTAT  
 CI7 3758 GCACATCGTGGAGGTGAACCCCAAGTGAAGT CATGAGCGGGCGAG CCGAGCCAGACGCGTGCATGCTTTTTTCTCTGCTCATTAAATTAT  
 K22 4115 TCCATACCTACTGCTTACTGCTCGTGGTTGTTGATTCAAAATTTCCCGGACGTGTATGAAACGTGCCGACCGAGTAGAGCTAGCTTTTC  
 CI7 3848 TCCATACC-----TACTGCTCGTGGTTGTTCAATTCAAAATTTCCCGGACGTGTATGAAACGTGCCGACCGAGTAGAGCTAGCTTTTC  
 K22 4205 AAACCAAAGGCATCGGATAAGTATTGATCTAATCCAGTCCAGTCTCATCCA CTATGCATGCCTGCGACAATCTGTTCCCTCTGCGCAA  
 CI7 3931 AAACCAAAGGCATCGGATAAGGATTGATCTAATCCAGTCCAGTCTCATCCA CTATGCATGCCTGCGACAATCTGTTCCCTCTGCGCAA  
 K22 4295 ATAGCGACGGGAAATCCCGGAGAACTGCCGCCCGCTCTGTGGATGTGGTCTCTTTTTTTTTTNNNNNNNNNNNNNNNNNNNNNNNN  
 CI7 4021 ATAGCGACGGGAAATCCCGGAGAACTGCCGCCCGCTCTGTGGATGTGGTCTCTTTTTTTTTTNNNNNNNNNNNNNNNNNNNNNNNN  
 K22 4385 NNNNNNNNNNNNNNNNNNNNNNNNNNNNNNNNNNNNNNNNNNNNNNNNNNNNNNNNNNNNNNNNNNNNNNNNNNNNNNNNNNNNNNN  
 CI7 4111 NNNNNNNNNNNNNNNNNNNNNNNNNNNNNNNNNNNNNNNNNNNNNNNNNNNNNNNNNNNNNNNNNNNNNNNNNNNNNNNNNNNNNNN  
 K22 4475 NNNNNNAAAAAATCTTGGTGTGTGGTGCAGGGCATCAGCAAAGGCGTGGTGGTGGACAGCCTGCTGTGCTCCATGGTCAGGACGG  
 CI7 4201 NNNNNNAAAAAATCTTGGTGTGTGGTGCAGGGCATCAGCAAAGGCGTGGTGGTGGACAGCCTGCTGTGCTCCATGGTGGAGGACGG  
 K22 4565 GGAAGCCGCGGACTTCTGCTGTGCATCGGCGACGACCGTCCGACGAGGACATGTTCCGAGAGCATCGTGTGCCCGGCTCCAGCAGCG  
 CI7 4291 GGAAGCCGCGGACTTCTGCTGTGCATCGGCGACGACCGTCCGACGAGGACATGTTCCGAGAGCATCGTGTGCCCGGCTCCAGTAGCG  
 K22 4655 GCGGCGTGAAGCTCCCGCCAGCAGCGAGGTGTTCCGCTGCACGGTGGGCAAGAAGCCGAGCATGGCCAAGTACTACCTGGACGACACGG  
 CI7 4381 GCGGCGTGAAGCTCCCGCCAGCAGCGAGGTGTTCCGCTGCACGGTGGGCAAGAAGCCGAGCATGGCCAAGTACTACCTGGACGACACGG  
 K22 4745 TGGACGTGGTCAAGATGCTGGACGGCTTGCCAGCGCGCCGTGCGCCGCGCAGCGCCGGGCGGCGGCGGCGTGCAGCTCCGGGTCT  
 CI7 4471 TGGACGTGGTCAAGATGCTGGACGGCTTGCCAGCGCGCCGTGCGCCGCGCAGCGCCGGGCGGCGGCGGCGTGCAGCTCCGGGTCT  
 K22 4835 CGTTCGAAGGCTCGCTCTGA - GGGGGAAGGGAAGTAAA - ACACAGCGCTAGCGGTAACAGCAAACGT CGAGCAAAGAAAGAA  
 CI7 4561 CGTTCGAAGGCTCGCTCTGAGGGGGGAAGGGAAGTAAAACACACAGCGCTAGCGGTAACAGCAAACGT CGAGCAAAGAAAGAA

**Figure S6. Sequence comparisons of *ZmTPS9* between CI7 and K22.** The numbers on the left indicate the nucleotide positions in the full-length sequences. Polymorphic sites between K22 and CI7 are shown in different colors. The promoter, three exons, and UTRs of *ZmTPS9* are shaded in green, blue, and orange, respectively. The ATG start codon and TGA stop codon are shown with yellow shading. The red underlines highlighted in exon1 and exon3 indicate nonsynonymous SNPs.

**Table S1** Statistical summary, broad-sense heritability, and variances associated with starch content in six RIL populations.

| Founders    |                                | RIL populations |                 |                                |             |                       |              |                        |                        |                     |
|-------------|--------------------------------|-----------------|-----------------|--------------------------------|-------------|-----------------------|--------------|------------------------|------------------------|---------------------|
| Inbred line | Starch content (mean $\pm$ SD) | Population      | Population size | Starch content (mean $\pm$ SD) | Range       | Variance <sup>a</sup> |              |                        | $h^2$ (%) <sup>b</sup> | CI (%) <sup>c</sup> |
|             |                                |                 |                 |                                |             | $\sigma_g^2$          | $\sigma_e^2$ | $\sigma_\varepsilon^2$ |                        |                     |
| DE3         | 69.73 $\pm$ 0.79               | DE3/BY815       | 204             | 62.04 $\pm$ 1.96               | 55.86–66.05 | 3.85**                | 1.58**       | 1.82                   | 86.4                   | 83.3–89.0           |
| K22         | 67.90 $\pm$ 1.02               | K22/BY815       | 207             | 61.70 $\pm$ 2.19               | 55.00–66.98 | 4.59**                | 3.11**       | 2.01                   | 87.2                   | 84.3–89.7           |
| DAN340      | 63.77 $\pm$ 1.04               | BY815/KUI3      | 187             | 60.54 $\pm$ 1.43               | 57.45–64.71 | 2.00**                | 2.14**       | 2.03                   | 74.7                   | 68.0–80.0           |
| KUI3        | 62.85 $\pm$ 0.41               | K22/CI7         | 178             | 65.01 $\pm$ 1.55               | 61.45–69.12 | 2.76**                | 0.44**       | 1.9                    | 81.3                   | 76.8–85.1           |
| B77         | 62.72 $\pm$ 0.34               | DAN340/K22      | 189             | 66.11 $\pm$ 1.02               | 63.17–68.60 | 1.29**                | 0.34**       | 1.57                   | 71.2                   | 64.4–76.9           |
| CI7         | 61.96 $\pm$ 0.04               | KUI3/B77        | 176             | 65.25 $\pm$ 1.36               | 61.92–68.40 | 1.85**                | 0.82**       | 1.55                   | 78.1                   | 72.4–82.7           |
| BY815       | 53.99 $\pm$ 0.01               |                 |                 |                                |             |                       |              |                        |                        |                     |

<sup>a</sup> $\sigma_g^2$  is genetic variance,  $\sigma_e^2$  is the environmental variance, and  $\sigma_\varepsilon^2$  is the residual variance. \*\*P < 0.01.

<sup>b</sup>Broad-sense heritability of starch content.

<sup>c</sup>95% confidence intervals for broad-sense heritability.

**Table S2** Summary of polymorphisms of five candidate genes in seven parents via resequencing

| Gene ID (Gene Name)             | Promoter |        | 5'UTR |        | Exon       |                |        | Intron |        |
|---------------------------------|----------|--------|-------|--------|------------|----------------|--------|--------|--------|
|                                 | SNPs     | InDels | SNPs  | InDels | Synonymous | Non-synonymous | InDels | SNPs   | InDels |
|                                 |          |        |       |        | SNPs       | SNPs           |        |        |        |
| <i>Zm00001d029039 (ZmABCI6)</i> | NA       | NA     | NA    | NA     | 16         | 0              | 2      | 111    | 8      |
| <i>Zm00001d001877 (ZmPSKR1)</i> | 44       | 5      | 0     | 0      | 36         | 22             | 3      | 0      | 0      |
| <i>Zm00001d012818 (ZmACP3)</i>  | 26       | 0      | 0     | 1      | 3          | 1              | 0      | 5      | 2      |
| <i>Zm00001d010607 (ZmCPR)</i>   | 54       | 2      | 0     | 0      | 38         | 12             | 0      | 0      | 0      |
| <i>Zm00001d025917 (ZmGTL3)</i>  | 34       | 6      | 0     | 0      | 14         | 1              | 1      | 0      | 0      |

NA: None available

**Table S3** Associations between the polymorphic sites at the *ZmTPS9* locus and starch content in maize kernels.

| Location | Marker <sup>a</sup> | Allele <sup>b</sup>            | MAF <sup>c</sup> | <i>P</i> -value      | Type         |
|----------|---------------------|--------------------------------|------------------|----------------------|--------------|
| Promoter | chr4.S_178024173    | <u>C</u> / <u>T</u>            | 0.06             | $1.2 \times 10^{-1}$ | Resequencing |
| Promoter | chr4.S_178024172    | <u>C</u> / <u>T</u>            | 0.13             | $4.4 \times 10^{-1}$ | Resequencing |
| Promoter | chr4.S_178024170    | <u>A</u> / <u>G</u>            | 0.13             | $4.4 \times 10^{-1}$ | Resequencing |
| Promoter | chr4.S_178024134    | <u>C</u> / <u>T</u>            | 0.13             | $4.4 \times 10^{-1}$ | Resequencing |
| Promoter | chr4.S_178024116    | <u>C</u> / <u>T</u>            | 0.22             | $3.2 \times 10^{-1}$ | Resequencing |
| Promoter | chr4.S_178024115    | <u>A</u> / <u>G</u>            | 0.13             | $4.4 \times 10^{-1}$ | Resequencing |
| Promoter | chr4.S_178024035    | <u>C</u> / <u>T</u>            | 0.23             | $3.9 \times 10^{-1}$ | Resequencing |
| Promoter | chr4.S_178024034    | <u>A</u> / <u>G</u>            | 0.23             | $3.9 \times 10^{-1}$ | Resequencing |
| Promoter | chr4.S_178023991    | <u>1</u> / <u>0</u>            | 0.09             | $6.1 \times 10^{-1}$ | Resequencing |
| Promoter | chr4.S_178023990    | <u>C</u> / <u>T</u>            | 0.09             | $6.1 \times 10^{-1}$ | Resequencing |
| Promoter | chr4.S_178023956    | <u>A</u> / <u>G</u>            | 0.14             | $3.7 \times 10^{-1}$ | Resequencing |
| Promoter | chr4.S_178023953    | <u>C</u> / <u>T</u>            | 0.13             | $4.4 \times 10^{-1}$ | Resequencing |
| Promoter | chr4.S_178023950    | <u>A</u> / <u>G</u> /-         | 0.04             | $2.2 \times 10^{-1}$ | Resequencing |
| Promoter | chr4.S_178023910    | <u>A</u> / <u>G</u>            | 0.09             | $6.1 \times 10^{-1}$ | Resequencing |
| Promoter | chr4.S_178023882    | <u>2</u> / <u>0</u>            | 0.13             | $4.4 \times 10^{-1}$ | Resequencing |
| Promoter | chr4.S_178023881    | <u>C</u> / <u>T</u>            | 0.22             | $8.9 \times 10^{-1}$ | Resequencing |
| Promoter | chr4.S_178023866    | <u>C</u> / <u>T</u>            | 0.2              | $9.2 \times 10^{-2}$ | Resequencing |
| Promoter | chr4.S_178023863    | <u>C</u> / <u>T</u>            | 0.09             | $6.1 \times 10^{-1}$ | Resequencing |
| Promoter | chr4.S_178023851    | <u>A</u> / <u>C</u>            | 0.13             | $4.4 \times 10^{-1}$ | Resequencing |
| Promoter | chr4.S_178023836    | <u>A</u> / <u>G</u>            | 0.13             | $4.4 \times 10^{-1}$ | Resequencing |
| Promoter | chr4.S_178023798    | <u>A</u> / <u>G</u> / <u>T</u> | 0.04             | $6.1 \times 10^{-1}$ | Resequencing |
| Promoter | chr4.S_178023771    | <u>G</u> / <u>T</u>            | 0.13             | $4.4 \times 10^{-1}$ | Resequencing |
| Promoter | chr4.S_178023763    | <u>C</u> / <u>T</u> /-         | 0.07             | $4.6 \times 10^{-1}$ | Resequencing |
| Promoter | chr4.S_178023762    | <u>1</u> / <u>0</u>            | 0.14             | $3.7 \times 10^{-1}$ | Resequencing |
| Promoter | chr4.S_178023751    | <u>A</u> / <u>G</u>            | 0.13             | $4.4 \times 10^{-1}$ | Resequencing |
| Promoter | chr4.S_178023738    | <u>A</u> / <u>G</u>            | 0.09             | $6.1 \times 10^{-1}$ | Resequencing |
| Promoter | chr4.S_178023727    | <u>A</u> / <u>G</u>            | 0.13             | $4.4 \times 10^{-1}$ | Resequencing |
| Promoter | chr4.S_178023724    | <u>0</u> / <u>1</u>            | 0.09             | $6.1 \times 10^{-1}$ | Resequencing |
| Promoter | chr4.S_178023712    | <u>0</u> / <u>1</u> / <u>2</u> | 0.003            | $9.0 \times 10^{-1}$ | Resequencing |
| Promoter | chr4.S_178023698    | <u>G</u> / <u>T</u>            | 0.13             | $4.4 \times 10^{-1}$ | Resequencing |
| Promoter | chr4.S_178023696    | <u>A</u> / <u>G</u>            | 0.13             | $4.4 \times 10^{-1}$ | Resequencing |
| Promoter | chr4.S_178023687    | <u>11</u> / <u>0</u>           | 0.13             | $4.4 \times 10^{-1}$ | Resequencing |
| Promoter | chr4.S_178023663    | <u>C</u> / <u>T</u>            | 0.09             | $6.1 \times 10^{-1}$ | Resequencing |
| Promoter | chr4.S_178023645    | <u>0</u> / <u>1</u>            | 0.14             | $7.2 \times 10^{-1}$ | Resequencing |
| Promoter | chr4.S_178023631    | <u>A</u> / <u>T</u>            | 0.13             | $4.4 \times 10^{-1}$ | Resequencing |
| Promoter | chr4.S_178023620    | <u>C</u> / <u>T</u>            | 0.13             | $4.4 \times 10^{-1}$ | Resequencing |
| Promoter | chr4.S_178023598    | <u>A</u> / <u>G</u>            | 0.41             | $9.8 \times 10^{-1}$ | Resequencing |

| Location | Marker <sup>a</sup> | Allele <sup>b</sup> | MAF <sup>c</sup> | <i>P</i> -value      | Type         |
|----------|---------------------|---------------------|------------------|----------------------|--------------|
| Promoter | chr4.S_178023597    | A/ <u>G</u>         | 0.49             | $8.1 \times 10^{-1}$ | Resequencing |
| Promoter | chr4.S_178023596    | A/ <u>C</u>         | 0.41             | $9.8 \times 10^{-1}$ | Resequencing |
| Promoter | chr4.S_178023545    | A/ <u>T</u>         | 0.09             | $6.1 \times 10^{-1}$ | Resequencing |
| Promoter | chr4.S_178023521    | C/ <u>T</u>         | 0.09             | $6.1 \times 10^{-1}$ | Resequencing |
| Promoter | chr4.S_178023298    | 0/ <u>283</u>       | 0.002            | $1.6 \times 10^{-1}$ | Agarose      |
| 5'UTR    | chr4.S_178023233    | <u>C</u> /G         | 0.37             | $8.9 \times 10^{-1}$ | 0.56 million |
| 5'UTR    | chr4.S_178023232    | <u>A</u> /G         | 0.37             | $8.9 \times 10^{-1}$ | 0.56 million |
| 5'UTR    | chr4.S_178023154    | A/ <u>G</u>         | 0.12             | $6.0 \times 10^{-1}$ | 0.56 million |
| 5'UTR    | chr4.S_178023082    | C/ <u>G</u>         | 0.12             | $8.1 \times 10^{-1}$ | 0.56 million |
| 5'UTR    | chr4.S_178022994    | A/ <u>G</u>         | 0.45             | $7.4 \times 10^{-2}$ | 0.56 million |
| 5'UTR    | chr4.S_178022993    | A/ <u>G</u>         | 0.32             | $9.1 \times 10^{-1}$ | 0.56 million |
| Exon1    | chr4.S_178022711    | A/ <u>G</u>         | 0.46             | $7.8 \times 10^{-1}$ | 0.56 million |
| Exon1    | chr4.S_178022635    | <u>A</u> /C         | 0.13             | $6.9 \times 10^{-1}$ | 0.56 million |
| Exon1    | chr4.S_178022588    | <u>A</u> /G         | 0.17             | $3.7 \times 10^{-1}$ | 0.56 million |
| Exon1    | chr4.S_178022417    | <u>G</u> /T         | 0.08             | $4.6 \times 10^{-1}$ | 0.56 million |
| Exon1    | chr4.S_178022321    | <u>A</u> /G         | 0.07             | $7.6 \times 10^{-1}$ | 0.56 million |
| Exon1    | chr4.S_178022270    | <u>A</u> /G         | 0.08             | $4.6 \times 10^{-1}$ | 0.56 million |
| Exon1    | chr4.S_178022252    | <u>G</u> /T         | 0.05             | $6.2 \times 10^{-1}$ | 0.56 million |
| Exon1    | chr4.S_178022129    | <u>A</u> /G         | 0.07             | $7.6 \times 10^{-1}$ | 0.56 million |
| Exon1    | chr4.S_178022108    | <u>C</u> /G         | 0.07             | $8.4 \times 10^{-1}$ | 0.56 million |
| Exon1    | chr4.S_178022060    | C/ <u>G</u>         | 0.07             | $8.2 \times 10^{-1}$ | 0.56 million |
| Exon1    | chr4.S_178022054    | <u>A</u> /G         | 0.07             | $8.2 \times 10^{-1}$ | 0.56 million |
| Exon1    | chr4.S_178021967    | <u>C</u> /T         | 0.08             | $4.6 \times 10^{-1}$ | 0.56 million |
| Exon1    | chr4.S_178021892    | C/ <u>T</u>         | 0.07             | $7.6 \times 10^{-1}$ | 0.56 million |
| Exon1    | chr4.S_178021772    | <u>A</u> /G         | 0.07             | $7.6 \times 10^{-1}$ | 0.56 million |
| Exon1    | chr4.S_178021716    | <u>C</u> /T         | 0.31             | $2.1 \times 10^{-1}$ | 0.56 million |
| Exon1    | chr4.S_178021676    | <u>A</u> /G         | 0.23             | $9.7 \times 10^{-1}$ | 0.56 million |
| Exon1    | chr4.S_178021616    | <u>A</u> /G         | 0.12             | $9.3 \times 10^{-3}$ | 0.56 million |
| Exon1    | chr4.S_178021547    | <u>A</u> /C         | 0.22             | $4.7 \times 10^{-1}$ | 0.56 million |
| Exon1    | chr4.S_178021532    | <u>A</u> /G         | 0.46             | $4.2 \times 10^{-1}$ | 0.56 million |
| Exon1    | chr4.S_178021511    | A/ <u>C</u>         | 0.08             | $1.9 \times 10^{-1}$ | 0.56 million |
| Exon1    | chr4.S_178021478    | <u>C</u> /G         | 0.08             | $1.9 \times 10^{-1}$ | 0.56 million |
| Exon1    | chr4.S_178021211    | A/ <u>G</u>         | 0.40             | $2.6 \times 10^{-1}$ | 0.56 million |
| Exon1    | chr4.S_178021172    | <u>C</u> /T         | 0.46             | $5.6 \times 10^{-1}$ | 0.56 million |
| Exon1    | chr4.S_178021073    | <u>A</u> /C         | 0.42             | $9.6 \times 10^{-1}$ | 0.56 million |
| Exon1    | chr4.S_178021064    | <u>A</u> /G         | 0.22             | $9.9 \times 10^{-1}$ | 0.56 million |
| Exon1    | chr4.S_178021010    | <u>A</u> /G         | 0.10             | $7.4 \times 10^{-1}$ | 0.56 million |
| Intron1  | chr4.S_178020972    | <u>G</u> /T         | 0.23             | $2.5 \times 10^{-1}$ | 0.56 million |
| Intron1  | chr4.S_178020924    | A/ <u>G</u>         | 0.11             | $4.6 \times 10^{-1}$ | 0.56 million |
| Intron1  | chr4.S_178020909    | A/ <u>G</u>         | 0.05             | $9.6 \times 10^{-3}$ | 0.56 million |

| Location | Marker <sup>a</sup> | Allele <sup>b</sup> | MAF <sup>c</sup> | <i>P</i> -value      | Type         |
|----------|---------------------|---------------------|------------------|----------------------|--------------|
| Intron1  | chr4.S_178020888    | <u>C</u> /T         | 0.12             | $2.5 \times 10^{-1}$ | 0.56 million |
| Intron1  | chr4.S_178020886    | <u>A</u> /T         | 0.13             | $1.2 \times 10^{-1}$ | 0.56 million |
| Intron1  | chr4.S_178020880    | <u>C</u> /G         | 0.06             | $1.6 \times 10^{-1}$ | 0.56 million |
| Intron1  | chr4.S_178020872    | <u>A</u> /T         | 0.13             | $3.2 \times 10^{-1}$ | 0.56 million |
| Intron1  | chr4.S_178020842    | <u>C</u> /G         | 0.12             | $4.6 \times 10^{-1}$ | 0.56 million |
| Intron1  | chr4.S_178020478    | <u>A</u> /C         | 0.21             | $8.5 \times 10^{-1}$ | 0.56 million |
| Intron1  | chr4.S_178020477    | C/ <u>G</u>         | 0.21             | $8.4 \times 10^{-1}$ | 0.56 million |
| Exon2    | chr4.S_178020361    | <u>C</u> /T         | 0.26             | $1.6 \times 10^{-1}$ | 0.56 million |
| Intron2  | chr4.S_178020086    | <u>C</u> /T         | 0.08             | $5.7 \times 10^{-2}$ | 0.56 million |
| Intron2  | chr4.S_178020047    | <u>C</u> /G         | 0.06             | $8.7 \times 10^{-2}$ | 0.56 million |
| Intron2  | chr4.S_178020017    | <u>A</u> /C         | 0.16             | $4.8 \times 10^{-1}$ | 0.56 million |
| Intron2  | chr4.S_178019995    | <u>C</u> /G         | 0.15             | $9.6 \times 10^{-1}$ | 0.56 million |
| Intron2  | chr4.S_178019877    | <u>A</u> /C         | 0.10             | $7.6 \times 10^{-1}$ | 0.56 million |
| Intron2  | chr4.S_178019876    | A/ <u>C</u>         | 0.36             | $4.3 \times 10^{-1}$ | 0.56 million |
| Exon3    | chr4.S_178019687    | A/ <u>C</u>         | 0.44             | $4.7 \times 10^{-1}$ | 0.56 million |
| Exon3    | chr4.S_178019586    | C/ <u>T</u>         | 0.47             | $1.2 \times 10^{-1}$ | 0.56 million |
| Exon3    | chr4.S_178019585    | <u>A</u> /G         | 0.47             | $1.2 \times 10^{-1}$ | 0.56 million |
| Exon3    | chr4.S_178019462    | <u>A</u> /C         | 0.19             | $2.1 \times 10^{-1}$ | 0.56 million |
| Exon3    | chr4.S_178019441    | C/ <u>T</u>         | 0.17             | $8.6 \times 10^{-1}$ | 0.56 million |
| 3'UTR    | chr4.S_178019332    | C/ <u>T</u>         | 0.06             | $7.8 \times 10^{-1}$ | 0.56 million |
| 3'UTR    | chr4.S_178019319    | C/ <u>T</u>         | 0.30             | $4.8 \times 10^{-1}$ | 0.56 million |
| 3'UTR    | chr4.S_178019237    | <u>A</u> /C         | 0.21             | $6.3 \times 10^{-2}$ | 0.56 million |
| 3'UTR    | chr4.S_178019236    | <u>A</u> /C         | 0.20             | $1.0 \times 10^{-2}$ | 0.56 million |
| 3'UTR    | chr4.S_178019234    | A/ <u>C</u>         | 0.04             | $2.1 \times 10^{-1}$ | 0.56 million |
| 3'UTR    | chr4.S_178019233    | A/ <u>C</u>         | 0.04             | $2.1 \times 10^{-1}$ | 0.56 million |
| 3'UTR    | chr4.S_178019232    | <u>A</u> /G         | 0.10             | $5.9 \times 10^{-1}$ | 0.56 million |
| 3'UTR    | chr4.S_178019220    | A/ <u>C</u>         | 0.09             | $3.8 \times 10^{-1}$ | 0.56 million |
| 3'UTR    | chr4.S_178019219    | C/ <u>G</u>         | 0.09             | $3.5 \times 10^{-1}$ | 0.56 million |
| 3'UTR    | chr4.S_178019218    | <u>A</u> /G         | 0.11             | $6.3 \times 10^{-1}$ | 0.56 million |
| 3'UTR    | chr4.S_178019216    | <u>G</u> /T         | 0.14             | $4.7 \times 10^{-1}$ | 0.56 million |
| 3'UTR    | chr4.S_178019210    | G/ <u>T</u>         | 0.15             | $2.9 \times 10^{-2}$ | 0.56 million |
| 3'UTR    | chr4.S_178019121    | C/ <u>G</u>         | 0.14             | $5.2 \times 10^{-1}$ | 0.56 million |
| 3'UTR    | chr4.S_178019103    | <u>C</u> /T         | 0.26             | $4.2 \times 10^{-1}$ | 0.56 million |

<sup>a</sup>The sites were named based on the physical position according to the B73 reference genome Version 4; blue shading indicates markers that show polymorphism between K22 and CI7.

<sup>b</sup>The underlined nucleotide in a bold font is the favorable allele for each SNP.

<sup>c</sup>Minor allele frequency

**Table S4** Primers used in this study.

| Type                      | Primer name | Forward Sequence (5' to 3') | Reverse Sequence (5' to 3') |
|---------------------------|-------------|-----------------------------|-----------------------------|
| EMS mutant identification | TPS9-EMS    | GTCCAACCTACCTGCTGGCTAA      | CCGCTCACGATGAACACTCT        |
| AMP508-promoter           | TPS9-AMseq  | GCCTCATGGCAAGGGAAGAA        | GGGCTTGGGCCTCTAGTCTT        |
| AMP508-283InDel           | TPS9-AMp283 | ACTGATGCACCCAACCATCC        | ATATGCGTGTGCGTGTCTGA        |
| Promoter                  | TPS9-CI7p   | TTCCAAACACCGACACCTCG        | GCAAGCTGGATATGCGTGTG        |
|                           | TPS9-K22p   | TTTTACACATGCCTTGCGGC        | GCAAGCTGGATATGCGTGTG        |
| Gene body                 | TPS9-G1     | CCATGAACCCACCGTTAGCC        | GCGTAGTCGAAGGTGTGGAA        |
|                           | TPS9-EMS    | GTCCAACCTACCTGCTGGCTAA      | CCGCTCACGATGAACACTCT        |
|                           | TPS9-G2     | GCCATCGTGCTCTCTGAGTT        | GCTCATGACTCACCTGGGG         |
|                           | TPS9-G3     | GTGACAACGTCTCACCGACT        | GCAGCTAATCCTACGCCACA        |
| qRT-PCR                   | TPS9-qRT    | CTGAATCGTCTGTGCGAGGA        | GCGGTGTTCTTCCAGTCCAG        |
| qRT-PCR                   | Actin       | AATGCCAGCAATGTATGT          | TTAGGTGGTCGGTGAGGT          |
| Resequencing              | ABCI-G1     | CACCTTTGCCTTGCAGGTTT        | ACCTGCTGCTTTTACGCTAT        |
|                           | ABCI-G2     | CAAACGTCATCCGAATCCGC        | GAACCTGCAAGGCAAAGGTG        |
|                           | ABCI-G3     | ATTGGGACTGCAAGGGATCG        | CTGTCCTCTGGCTCCATGTC        |

| Type                        | Primer name                         | Forward Sequence (5' to 3')   | Reverse Sequence (5' to 3')  |
|-----------------------------|-------------------------------------|-------------------------------|------------------------------|
| Resequencing                | ABCI-G4                             | AGCGAGCGTTAGAATCTGGG          | TGCGGACCTACGTAGACAGA         |
|                             | PSKR1-P1                            | GCCACAAATGTCGAGCTGTC          | CCTGTTGGAGAGATCCAGCG         |
|                             | PSKR1-G1                            | TCCTTGGGAGTTTCTGCGAC          | AGGGTAAATGGGCCATGCAA         |
|                             | ACP-P1                              | CAAGGTCCAGCAGGGACAAT          | GACGACCGTCGATGGAATCA         |
|                             | ACP-P2                              | GCGAGTGACCACAACAGAGA          | CGGGCGCTTTGTTATTACGG         |
|                             | ACP-P3                              | GGCTTCCACTTGTGCTTTGG          | GGAAAGCTTGCTCTTTGCC          |
|                             | ACP-G1                              | CCTTTGCCATTTTTGCGGGT          | ACCAACGGCAGGTACAAGAG         |
|                             | CPR-G1                              | AGGCGTCCCAAACAAATGC           | ATCCTGGCAATCTCCTGTGC         |
|                             | CPR-P1                              | TCATCCCCGCTGGAATCTCA          | GATGTCCTGCTGCTCCCATC         |
|                             | GTL-P1                              | TCGGATTCAAGCCAGCAACT          | TCCCGGAGAATCTGATGGGT         |
|                             | GTL-G1                              | ACCCAATAAAACCACAGGGA          | GTGTCCAGGTGGGACTAATGT        |
| Transient expression assays | TPS9-LUC (K22 and CI7)              | ACTCACTATAGGGCGAATTGGGTACCGTA | GAACTAGTGGATCCCCCGGGCTGCAGCG |
|                             |                                     | GCGTAAGCCACCGATGA             | CCTCCTCGTCCTCCTC             |
|                             | TPS9-LUC-1 (K22 <sup>-283bp</sup> ) | ACTCACTATAGGGCGAATTGGGTACCGTA | GCTTGGGCCTCTAGTCTTATCCACAACG |
|                             |                                     | GCGTAAGCCACCGATGA             | TTCGCCCGCG                   |



| Type | Primer name                                  | Forward Sequence (5' to 3')                        | Reverse Sequence (5' to 3')                     |
|------|----------------------------------------------|----------------------------------------------------|-------------------------------------------------|
|      | TPS9-LUC-2 (K22 <sup>-283bp</sup> )          | CGCGGGCGAACGTTGTGGATAAGACTAG<br>AGGCCCAAGC         | GAACTAGTGGATCCCCGGGCTGCAGCG<br>CCTCCTCGTCCTCCTC |
|      | TPS9-LUC-1 (CI7 <sup>+283bp</sup> )          | ACTCACTATAGGGCGAATTGGGTACCGTA<br>GCGTAAGCCACCGATGA | CCCACTGTACATGCCCTTATCCACATCG<br>TTCGCCCCGCGG    |
|      | TPS9-LUC-2-indel<br>(CI7 <sup>+283bp</sup> ) | CCGCGGGCGAACGATGTGGATAAGGGCA<br>TGTACAGTGGG        | GCTTGGGCCTCTAGTCTTAGGGCATGTA<br>CAACCTAGATAC    |
|      | TPS9-LUC-3 (CI7 <sup>+283bp</sup> )          | GTATCTAGGTTGTACATGCCCTAAGACTA<br>GAGGCCCAAGC       | GAACTAGTGGATCCCCGGGCTGCAGCG<br>CCTCCTCGTCCTCCTC |
